# Supplementary material for: Crystallization of molecular systems from solution: phase diagrams, supersaturation and other basic concepts
Source: Royal Society of Chemistry journal article supplement (doi:10.1039/c3cs60359h), 2014-01-01
Supplement: c3cs60359h.pdf [file c3cs60359h.pdf]

## ESI, Tutorial Review: G. Coquerel

After Faust & Esselman, Z. anorg. Ch., 157, 290, 1926 (Isotherm at 29.5°C)

L1, L2, L3 and L4 are invariant liquids.

$\text{Na}_2\text{SO}_4$ ;  $\text{Na}_3\text{H}(\text{SO}_4)_2$ ;  $\text{NaHSO}_4\text{-H}_2\text{O}$ ;  $\text{NaHSO}_4$  are all non congruent solubility phases in water. Their solubility curves are: L1L2, L2L3, L3L4 and L4-no end respectively.

Starting from the mixture represented by P1, an isothermal evaporation would lead to the crystallization of  $\text{Na}_3\text{H}(\text{SO}_4)_2$  = letovicite. If the evaporation is continued a mixture of two solid phases will be obtained in liquid L3:

$\text{Na}_3\text{H}(\text{SO}_4)_2$  and  $\text{NaHSO}_4\text{-H}_2\text{O}$

When no liquid remains (point T) only  $\text{NaHSO}_4\text{-H}_2\text{O}$  will be present. If this latter phase is dehydrated then  $\text{NaHSO}_4$  could be obtained.

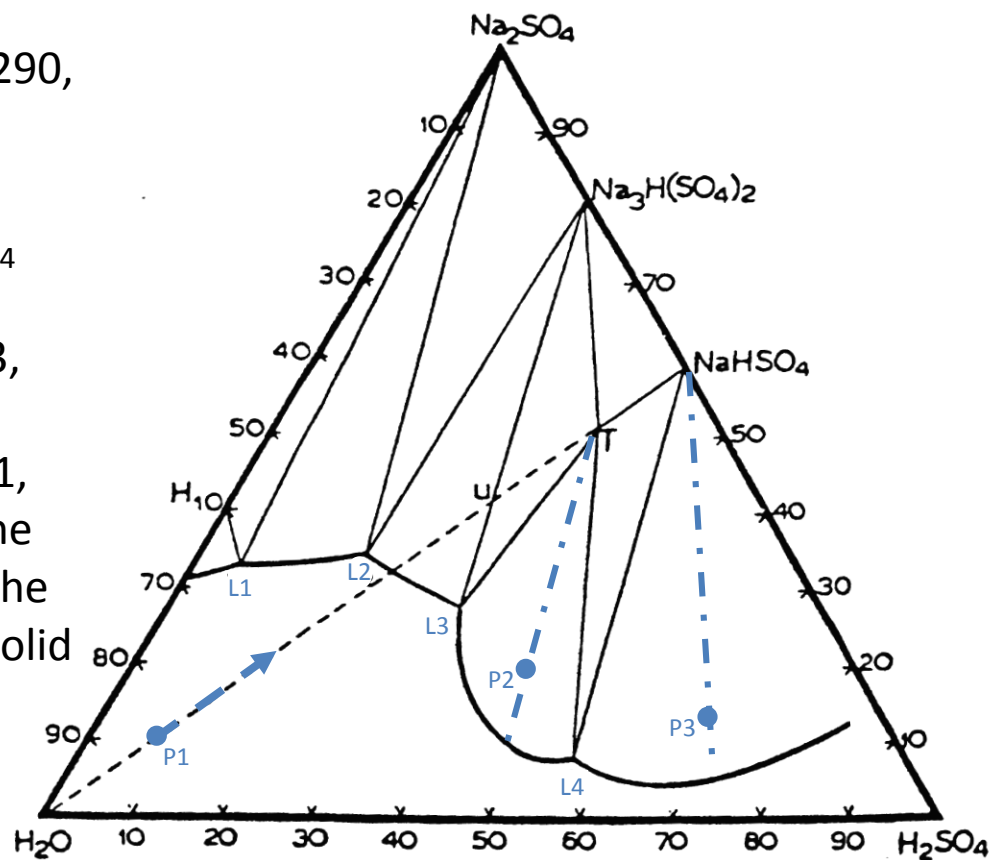

Conversely it is possible to obtain directly:  $\text{NaHSO}_4\text{-H}_2\text{O}$  and  $\text{NaHSO}_4$  by just starting from mixtures P2 and P3 respectively.

ESI, Tutorial Review: G. Coquerel

After: Ketner, Z. Physik Chem., 39, 641,  
1902 (Isotherm at 31.5°C)

B, L1, L2, C and D are invariant liquids.  
 $\text{Na}_2\text{CO}_3$ ; exists as an anhydrous phase,  
a monohydrate H1, a Heptahydrate H7  
and a decahydrate H10.

H7, H1 and the anhydrous sodium  
carbonate have a non congruent  
solubility in water. H10, H7 and H1  
have a non congruent solubility in pure  
ethanol.

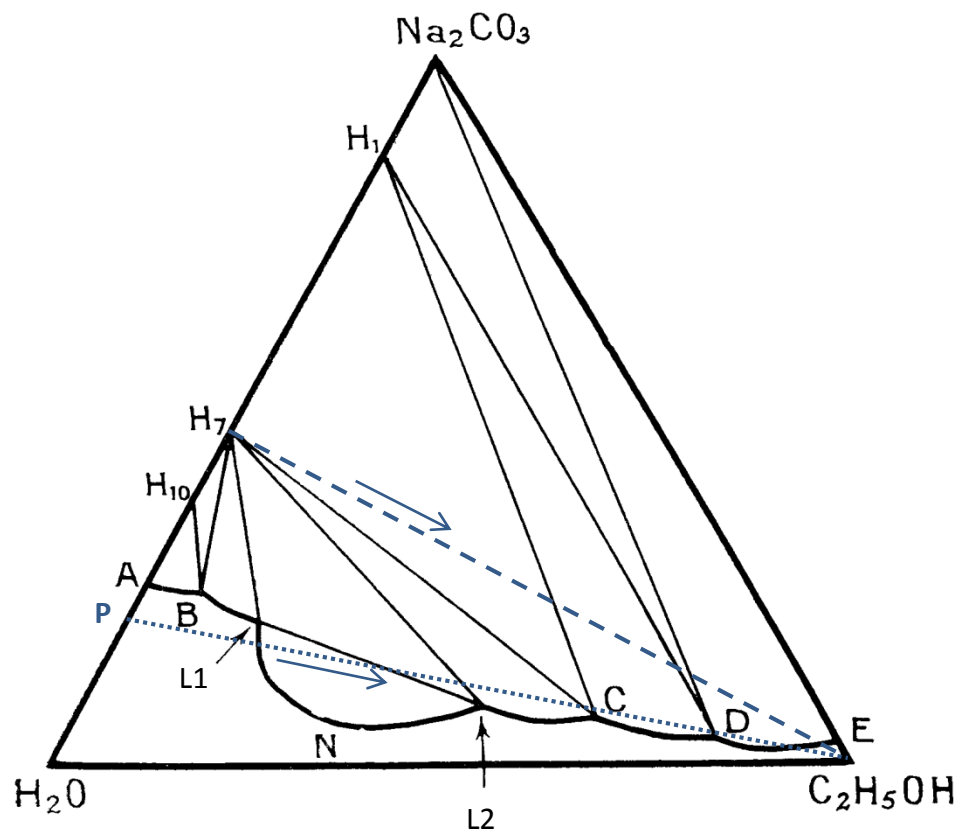

Starting from the undersaturated aqueous solution represented by P, on successive addition of ethanol the system will exhibit: (i) a liquid liquid demixion (ii) H7 and liquids L1 plus L2 (iii) H7 and a saturated solution, (iv) small domain where H7 and H1 co-exist with the doubly saturated liquid C (v) H1 and its saturated solution (vi) very small domain: liquid D and H1 plus sodium carbonate (viii) few crystals of anhydrous sodium carbonate and its saturated solution (vii) homogeneous understaturated solution

Starting from H7, on successive additions of pure ethanol one can observe: (i) coexistence of H7, H1 and doubly saturated liquid C (ii) H1 and a saturated solution (iii) a narrow domain including H1  $\text{Na}_2\text{CO}_3$  and the doubly saturated liquid D (iv)  $\text{Na}_2\text{CO}_3$  with its saturated solution (v) homogeneous understaturated solution.
